1 **Title**

2 **Optogenetic relaxation of actomyosin contractility uncovers mechanistic roles of**  
3 **cortical tension during cytokinesis.**

4

5 **Authors**

6 Kei Yamamoto<sup>1,2,3</sup>, Haruko Miura<sup>1,2</sup>, Motohiko Ishida<sup>4,5</sup>, Satoshi Sawai<sup>4,5</sup>, Yohei Kondo<sup>1,2,3\*</sup>, and  
7 Kazuhiro Aoki<sup>1,2,3,6\*</sup>

8

9 **Affiliations**

10 <sup>1</sup>Division of Quantitative Biology, National Institute for Basic Biology, National Institutes of  
11 Natural Sciences, 5-1 Higashiyama, Myodaiji-cho, Okazaki, Aichi 444-8787, Japan.

12 <sup>2</sup>Quantitative Biology Research Group, Exploratory Research Center on Life and Living Systems  
13 (ExCELLS), National Institutes of Natural Sciences, 5-1 Higashiyama, Myodaiji-cho, Okazaki,  
14 Aichi 444-8787, Japan.

15 <sup>3</sup>Department of Basic Biology, School of Life Science, SOKENDAI (The Graduate University for  
16 Advanced Studies), 5-1 Higashiyama, Myodaiji-cho, Okazaki, Aichi 444-8787, Japan.

17 <sup>4</sup>Graduate School of Arts and Sciences, University of Tokyo, Komaba, 153-8902 Tokyo, Japan.

18 <sup>5</sup>Research Center for Complex Systems Biology, Universal Biology Institute, University of Tokyo,  
19 Komaba, 153-8902 Tokyo, Japan.

20 <sup>6</sup>Lead Contact

21 \*Co-corresponding authors

22 \*Correspondence: [y-kondo@nibb.ac.jp](mailto:y-kondo@nibb.ac.jp) and [k-aoki@nibb.ac.jp](mailto:k-aoki@nibb.ac.jp)

23

24

25 **Keywords**

26 optogenetics, myosin II, MYPT1, cytokinesis

27

## 28 **Abstract**

29 Actomyosin contractility generated cooperatively by nonmuscle myosin II and actin filaments plays  
30 essential roles in a wide range of biological processes, such as cell motility, cytokinesis, and tissue  
31 morphogenesis. However, it is still unknown how actomyosin contractility generates force and  
32 maintains cellular morphology. Here, we demonstrate an optogenetic method to induce relaxation  
33 of actomyosin contractility. The system, named OptoMYPT, combines a catalytic subunit of the  
34 type I phosphatase-binding domain of MYPT1 with an optogenetic dimerizer, so that it allows light-  
35 dependent recruitment of endogenous PP1c to the plasma membrane. Blue-light illumination was  
36 sufficient to induce dephosphorylation of myosin regulatory light chains and decrease in traction  
37 force at the subcellular level. The OptoMYPT system was further employed to understand the  
38 mechanics of actomyosin-based cortical tension and contractile ring tension during cytokinesis. We  
39 found that the relaxation of cortical tension at both poles by OptoMYPT accelerated the furrow  
40 ingression rate, revealing that the cortical tension substantially antagonizes constriction of the  
41 cleavage furrow. Based on these results, the OptoMYPT system will provide new opportunities to  
42 understand cellular and tissue mechanics.

43

44

## 45 **INTRODUCTION**

46 Actomyosin contractility underlies force generation in a wide range of cellular and tissue  
47 morphogenesis in animals. Prominent examples include the tail retraction of directionally migrating  
48 fibroblasts and the constriction of a contractile ring during cytokinesis (Green, Paluch, and Oegema  
49 2012; Ridley et al. 2003). The actin-rich cell cortex, a thin network underneath the plasma  
50 membrane, is also relevant to the actomyosin contractility involved in maintaining cell morphology;  
51 namely, the actomyosin contractility at the cell cortex not only tunes mechanical rigidity, but also  
52 renders cells rapidly deformable as manifested in cell division and amoeboid migration (Kelkar,  
53 Bohec, and Charras 2020; Paluch, Aspalter, and Sixt 2016). Thus, it is of critical importance to  
54 disentangle the mode of action of actomyosin in order to understand how cells generate force and  
55 shape their morphology.

56 The actomyosin contractility in nonmuscle cells is mainly attributed to the force generated  
57 by nonmuscle myosin II (NMII) (Vicente-Manzanares et al. 2009). NMII contains two heavy  
58 chains, two essential light chains, and two regulatory light chains (Vicente-Manzanares et al. 2009;  
59 Heissler and Manstein 2013). The myosin regulatory light chains (MLCs) are phosphorylated by  
60 myosin light chain kinase (MLCK) and Rho-kinase (ROCK), thereby inducing conformational  
61 change in NMII and increasing its motor activity (Vicente-Manzanares et al. 2009). Small chemical

62 compounds have been widely used to perturb the actomyosin contractility, such as blebbistatin (an  
63 inhibitor for NMII ATPase activity), Y-27632 (a ROCK inhibitor), and ML-7 (an MLCK inhibitor)  
64 (Straight et al. 2003; Uehata et al. 1997; Saitoh et al. 1987). While these compounds have allowed  
65 researchers to better understand the function of NMII, it is still technically challenging to control  
66 their actions at the subcellular resolution because of their rapid diffusion.

67 To overcome this limitation, recent efforts have been devoted to the development and  
68 application of optogenetic tools to manipulate cell signaling related to actomyosin contractility  
69 (Krueger et al. 2019). The most popular approach is to control the activity of RhoA, a member of  
70 Rho family small GTPases. Light-induced recruitment of RhoGEF triggers RhoA activation, which  
71 in turn activates ROCK and inactivates myosin light chain phosphatase (MLCP) (Wagner and  
72 Glotzer 2016; Kimura et al. 1996; Valon et al. 2017) (Fig. 1a). These reactions eventually induce  
73 myosin light chain phosphorylation, followed by an increase in the actomyosin contractility. It has  
74 been reported that local accumulation of RhoGEF by light increases contractile force at the  
75 subcellular scale (Wagner and Glotzer 2016; Oakes et al. 2017; Valon et al. 2017). These  
76 technologies allow activation of NMII at the equator and the induction of partial constriction in  
77 rounded cells in metaphase (Wagner and Glotzer 2016). Valon *et al.* further demonstrated that  
78 trapping of overexpressed RhoGEF to the outer membrane of mitochondria resulted in a decrease in  
79 actomyosin contractility (Valon et al. 2017). In addition, depletion of PI(4,5)P<sub>2</sub> at the plasma  
80 membrane by optogenetic membrane translocation of 5-phosphatase OCRL has been shown to  
81 modulate cell contractility and inhibit apical constriction during *Drosophila* embryogenesis  
82 (Guglielmi et al. 2015). Although many of these tools enhance actomyosin contractility through  
83 RhoA or phospholipids, tools that reduce actomyosin contractility below the basal level have not  
84 yet been developed.

85 Here, we report a new optogenetic tool to directly inactivate NMII; the system, called  
86 OptoMYPT, is designed to recruit an endogenous catalytic subunit of type Ic phosphatase (PP1c) to  
87 the plasma membrane with light, thereby dephosphorylating and inactivating NMII. We  
88 demonstrate that MLCs are dephosphorylated and the traction force exerted by cells is reduced at  
89 the local area where blue light was illuminated. Moreover, this system was applied to the mechanics  
90 of cytokinesis to understand how and to what extent actomyosin-based cortical tension antagonizes  
91 contractile ring tension and contributes to the cleavage furrow ingression rate.

92  
93  
94  
95

## 96 **RESULTS**

### 97 **Design of an OptoMYPT system for reducing intracellular contractile force.**

98 To manipulate the intracellular contractile force, we focused on MLCP, which is composed of three  
99 subunits, a catalytic subunit PP1c, a regulatory subunit (MYPT1), and a smaller subunit of 20-kDa  
100 (M20) (Ito et al. 2004). MYPT1 contains a PP1c-binding domain (PP1BD) and myosin heavy chain  
101 (MHC)-binding domain (Fig. 1b). MYPT1 holds PP1c through the PP1BD, and recruits it to NMII  
102 to dephosphorylate MLC, leading to the inactivation of NMII. Phosphorylated MLC is mainly  
103 localized near the plasma membrane such as at cortical actin and stress fibers, where the NMII  
104 exerts mechanical force (Du and Frohman 2009).

105 Our strategy for the reduction of contractile force is based on inducing membrane  
106 translocation of the PP1BD in MYPT1 with light, resulting in the co-recruitment of endogenous  
107 PP1c at the plasma membrane and dephosphorylation of MLC. We refer to this system as the  
108 OptoMYPT system. It has been reported that the 1 to 38 amino acids (a.a.) in the PP1BD are  
109 particularly important for binding to PP1c, and that the 170 to 296 a.a. in the PP1BD serve as a  
110 phosphorylated MLC-binding domain (Hirano, Phan, and Hartshorne 1997). As an optogenetic  
111 switch in this study, we mainly employed the improved Light-Induced Dimer (iLID) system, which  
112 binds to its binding partner, SspB, upon blue light illumination and dissociates from SspB under the  
113 dark condition (Guntas et al. 2015). The iLID-based OptoMYPT system consists of a light-  
114 switchable plasma membrane localizer, Stargazin-mEGFP-iLID, and an actuator, SspB-mScarlet-I-  
115 PP1BD, which is translocated to the plasma membrane for the co-recruitment of the endogenous  
116 PP1c with blue light (Fig. 1c). The Stargazin-mEGFP-iLID is suited for the subcellular protein  
117 recruitment, because the large N-terminal transmembrane anchor limits the diffusion of SspB  
118 proteins (Natwick and Collins 2021). Alternatively, we developed a cryptochrome 2 (CRY2)-based  
119 OptoMYPT system, in which CRY2-mCherry-PP1BD was recruited to the plasma membrane with  
120 blue light through binding to the plasma membrane localizer CIBN-EGFP-KRasCT (Kennedy et al.  
121 2010).

122 We first compared the efficacy of light-induced membrane translocation between three  
123 different lengths of PP1BDs: 1-38, 1-169, and 1-296 (hereafter referred to as MYPT38, MYPT169,  
124 and MYPT296, respectively). In line with the previous study (Wu et al. 2005), SspB-mScarlet-I-  
125 PP1BDs accumulated at the nucleus (Fig. S1a,b). To circumvent this problem, the nuclear export  
126 signal (NES) was fused with the C terminus of the PP1BDs to export them to the cytoplasm (Fig.  
127 S1a,b). As a control, we confirmed that Madin-Darby Canine Kidney (MDCK) cells exhibited the  
128 translocation of SspB-mScarlet-I from the cytoplasm to the plasma membrane upon blue light  
129 illumination (Fig. 1d,e). SspB-mScarlet-I-MYPT169 showed the best membrane translocation in  
130 three differential lengths of PP1BDs (Fig. 1e; Movie S1). We recognized that a small fraction of

131 SspB-mScarlet-I-MYPT38 still resided in the nucleus (Fig. 1d, yellow arrowhead), and CRY2-  
132 mCherry-MYPT38 formed aggregates and puncta in a blue light-dependent manner for an unknown  
133 reason (Fig. S2). Next, we investigated whether PP1BDs of MYPT1 indeed bind to PP1c and  
134 recruit it to the plasma membrane. In control cells, PP1c fused with miRFP703 (PP1c-miRFP703),  
135 which was mainly localized at the nucleus, did not show any change in the subcellular localization  
136 upon blue light illumination (Fig. 1d,f). As expected, SspB-mScarlet-I-MYPT38, -MYPT169, and -  
137 MYPT296 demonstrated similar levels of translocation of PP1c-miRFP703 from the cytoplasm to  
138 the plasma membrane upon blue light illumination (Fig. 1d,f; Movie S2). We further evaluated the  
139 effect of overexpression of PP1BD on basal phosphorylation of MLC (ppMLC) by western blotting  
140 analysis. Interestingly, MLCs were almost completely dephosphorylated in MYPT296-  
141 overexpressing cells (Fig. S1c). Indeed, the cells expressing MYPT296 showed flattened  
142 morphology with membrane protrusions similar to the morphology of cells treated with ROCK  
143 inhibitor or myosin inhibitor (Worthylake and Burridge 2003; Totsukawa et al. 2004) (Fig. S1a).  
144 This result is consistent with the previous report pointing out the existence of the ppMLC-binding  
145 domain at the 170–296 a.a., which may facilitate recruitment of PP1BD to NMII and  
146 dephosphorylation of MLC without any stimulation (Hirano, Phan, and Hartshorne 1997). Taken  
147 together, these results led us to conclude that MYPT169 is well suited for the OptoMYPT system.

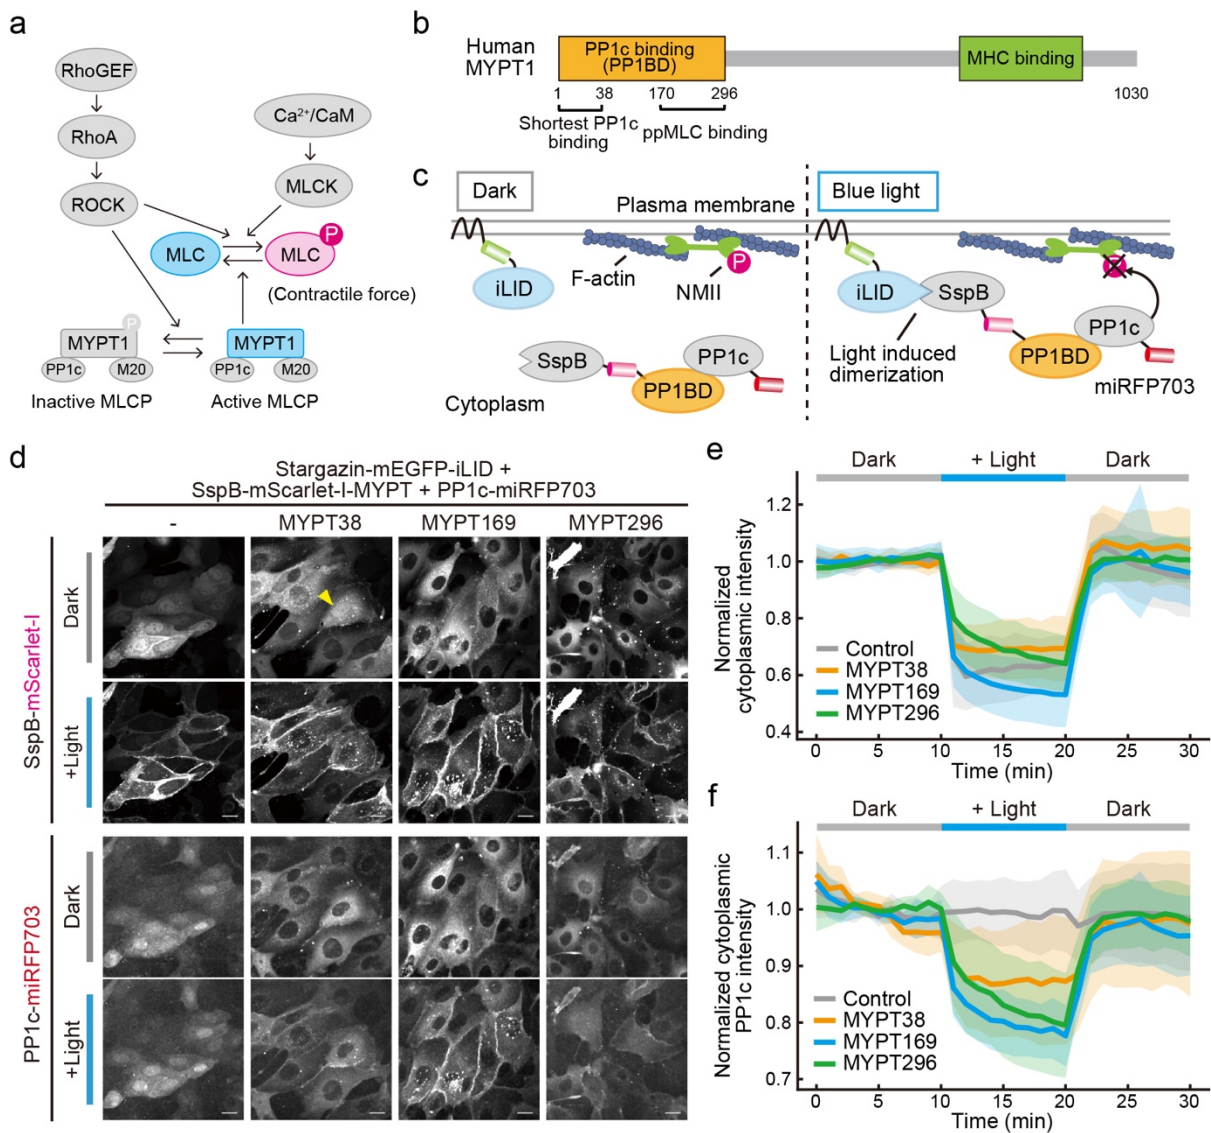

148

149 **Figure 1. Development of the OptoMYPT system.** (a) Schematic illustration of the signaling  
150 pathway for the regulation of MLC phosphorylation. (b) Domain structure of human MYPT1. (c)  
151 Schematic illustration of the OptoMYPT system. Stargazin-mEGFP-iLID is anchored to the plasma  
152 membrane. Upon blue light illumination, the SspB-mScarlet-I-fused PP1c-binding domain  
153 (PP1BD) of MYPT1 translocates to the plasma membrane along with endogenous PP1c, and  
154 inactivates NMII at the cell cortex. (d) Representative images of the SspB-mScarlet-I or the  
155 indicated SspB-mScarlet-I-PP1BDs of MYPT1 (upper two rows) and simultaneously expressing  
156 PP1c-miRFP703 (lower two rows) in MDCK cells under the dark condition (the first and third  
157 rows) and blue light condition (the second and fourth rows). Stargazin-mEGFP-iLID was also  
158 expressed as a localizer in all experiments. The yellow arrowhead indicates a cell showing nuclear  
159 accumulation of SspB-mScarlet-I-MYPT38. Scale bar, 20  $\mu$ m. (e) Quantification of the  
160 cytoplasmic fluorescence change in mScarlet-I in panel d. The average values (bold lines) are  
161 plotted as a function of time with the SD. n = 15 cells. (f) Quantification of the cytoplasmic

162 fluorescence change in PP1c-miRFP703 in the indicated MDCK cells. The average values (bold  
163 lines) are plotted as a function of time with the SD. n = 15 cells.

164

165

### 166 **Characterization of the OptoMYPT system.**

167 To evaluate whether the OptoMYPT dephosphorylates ppMLC in a blue light-dependent manner,  
168 we directly stained ppMLC with immunofluorescence. The blue light was locally illuminated for 15  
169 min, followed by fixation and immunofluorescence staining with the anti-ppMLC antibody (Fig.  
170 2a). We herein adopted a CRY2-based OptoMYPT system (Kennedy et al. 2010), because the  
171 slower dissociation kinetics of the CRY2-CIB system compared to that of the iLID-SspB system  
172 was preferable for this experiment. Local illumination of blue light induced spatially restricted  
173 recruitment of CRY2-mCherry and CRY2-mCherry-MYPT169 (Fig. 2b, right column). In addition,  
174 the local recruitment of CRY2-mCherry-MYPT169, but not CRY2-mCherry, attenuated the  
175 ppMLC signal (Fig. 2b, left column). The quantification of ppMLC fluorescence intensity in dark  
176 and light illuminated areas (Fig. 2a) revealed a significant reduction in the ppMLC level (Fig. 2c).

177 The decrease in ppMLC by OptoMYPT prompted us to examine the effect on contractile  
178 force by light. To do this, traction force microscopy was applied to randomly migrating MDCK  
179 cells expressing the OptoMYPT system. The cells were seeded on polyacrylamide gel containing  
180 infra-red fluorescence beads, so that we could infer the traction force by the displacement of  
181 fluorescence beads and the mechanical properties of the polyacrylamide gel (Fig. 2d). The blue  
182 light was locally focused on the lamellipodial region, where the cells were generating strong  
183 traction force. SspB-mScarlet-I-MYPT169 was successfully recruited to the locally illuminated area  
184 (Fig. 2e, upper). Under this condition, the traction force was reduced after blue light illumination  
185 (Fig. 2e, lower; Fig. 2f, Movie S3). These results indicate that the OptoMYPT system can  
186 dephosphorylate ppMLCs by local blue light illumination, leading to a reduction of traction force.

187

188

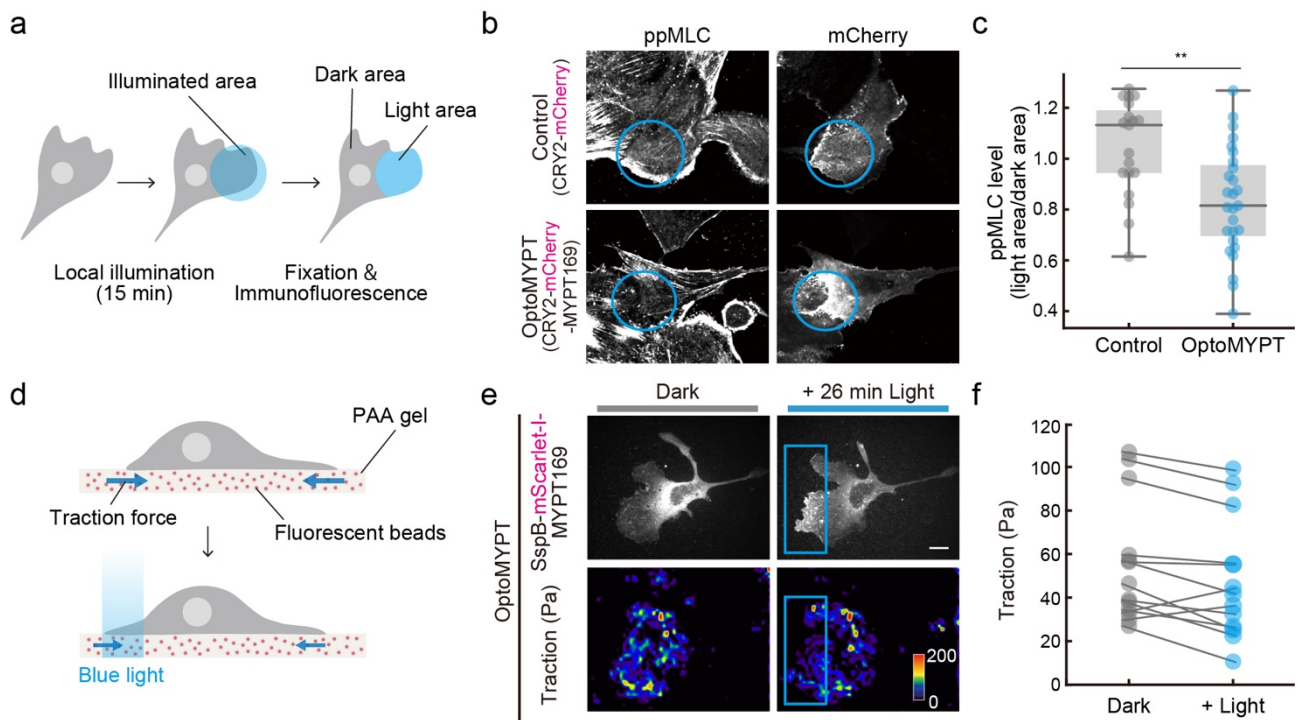

189

190 **Figure 2. Characterization of the OptoMYPT system.** (a) Schematic illustration of an  
 191 experimental procedure to quantify ppMLC levels. The blue light was locally focused on the  
 192 lamellipodial area in each cell, followed by fixation and immunostaining. (b) Immunofluorescence  
 193 analysis of ppMLC after local blue-light illumination. The upper and lower images show MDCK  
 194 cells expressing CRY2-mCherry and CRY2-mCherry-MYPT169, respectively. CIBN-EGFP-  
 195 KRasCT was also expressed as a localizer in both experiments. Blue circles indicate the area  
 196 illuminated with blue light. Scale bar, 10  $\mu\text{m}$ . (c) The ppMLC level was quantified by dividing the  
 197 mean fluorescence intensity of the light area by that of the dark area in panel a, and shown as a box  
 198 plot, in which the box extends from the first to the third quartile with the whiskers denoting 1.5  
 199 times the interquartile range.  $n = 19$  and  $27$  cells for the control and OptoMYPT, respectively.  $**p$   
 200  $< 0.01$  (student's  $t$ -test). (d) Schematic illustration of the traction force microscopy. (e) Traction  
 201 force measurement in an MDCK cell expressing SspB-mScarlet-I-MYPT169 and Stargazin-  
 202 mEGFP-iLID. Blue rectangles indicate blue-light illuminated areas. Traction force (Pa) is  
 203 represented as a pseudo color. Scale bar, 20  $\mu\text{m}$ . (f) Quantification of the traction force before and  
 204 after blue-light illumination.  $n = 13$  cells.

205

206

## 207 **Membrane protrusion induced by local dephosphorylation of ppMLC with OptoMYPT**

208 We next examined whether local dephosphorylation of ppMLC and reduction of contractile force  
 209 have an impact on cell morphology by using OptoMYPT. The control MDCK cells that expressed  
 210 SspB-mScarlet-I, Stargazin-mEGFP-iLID, and Lifeact-miRFP703 demonstrated local accumulation



211 of SspB-mScarlet-I by blue light illumination, but did not show morphological change (Fig. 3a). On  
 212 the other hand, the OptoMYPT-expressing MDCK cells reproducibly showed peripheral membrane  
 213 protrusions in the blue-light exposed area (Fig. 3b; Movie S4). We evaluated light-induced  
 214 membrane protrusion with a kymograph and time-course graph, which showed the movement of the  
 215 cell edge upon blue light illumination in OptoMYPT-expressing cells (Fig. 3c, d). The protruding  
 216 membrane was subsequently maintained under dark conditions. Interestingly, we often recognized  
 217 membrane retraction on the opposite side of the blue-light illumination area (Fig. 3e, arrowhead;  
 218 Movie S5). The OptoMYPT-induced membrane protrusion and retraction are consistent with the  
 219 previous reports showing Rac1 activation by inhibiting NMII or ROCK (Even-Ram et al. 2007;  
 220 Martin et al. 2016) and regulation of cell polarity by membrane tension (Houk et al. 2012).  
 221  
 222

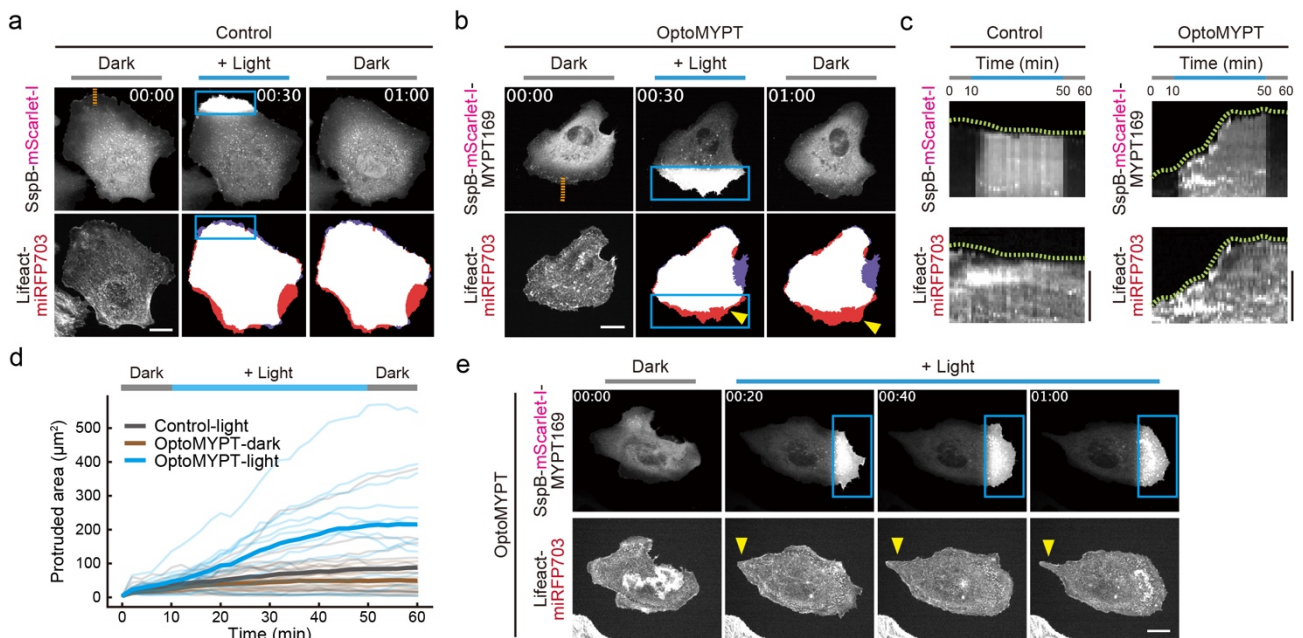

223  
 224 **Figure 3. Induction of membrane protrusion by the OptoMYPT system.** (a, b) Simultaneous  
 225 visualization of SspB-mScarlet-I (a) or SspB-mScarlet-I-MYPT169 (b) with F-actin (Lifeact-  
 226 miRFP703) in MDCK cells. Blue rectangles indicate blue-light illuminated areas. The middle and  
 227 right bottom images show binary images reconstructed from Lifeact-miRFP703 images; red and  
 228 purple areas represent protruding and retracting areas, respectively. The yellow arrowheads depict  
 229 membrane protrusion. Scale bar, 20 μm. (c) Kymographs were drawn along the orange dashed lines  
 230 in panels a and b. Green dashed lines show cell boundaries. Scale bar, 5 μm. (d) Quantification of  
 231 the local protruding areas under the indicated conditions. The total protruded area was calculated by  
 232 subtracting the cell area in the locally illuminated region at t = 0 from that at each time point. Local  
 233 blue light was illuminated from 10 to 50 min. The thin and bold lines indicate the individual and  
 234 averaged data, respectively. n = 15, 13, and 12 cells for Control-light (local blue light illumination),

235 OptoMYPT-dark (dark condition), OptoMYPT-light (local blue light illumination), respectively. (e)  
236 Representative images of the induction of membrane retraction (yellow arrowhead) on the opposite  
237 side of the blue-light illuminated area.

238

239

240 **Acceleration of the ingression rate of cleavage furrows during cytokinesis by the optical**  
241 **relaxation of cortical tension.**

242 We next applied the OptoMYPT system to elucidate the mechanical regulation of the actin cortex  
243 during cytokinesis. In this process, a contractile ring, which is mainly composed of F-actin and  
244 NMII, transiently forms in the equatorial plane and generates tension to constrict the ring and divide  
245 a cell into two daughter cells (Fig. 4a, solid arrows). The tension in the contractile ring is  
246 counteracted by the tension generated by cortical actomyosin (Fig. 4a, dashed arrows). Recent  
247 studies showed that genetic and pharmacological perturbations to the cortical actomyosin disrupted  
248 proper cytokinesis (Taneja et al. 2020; Yamamoto et al. 2019; Sedzinski et al. 2011; O'Connell,  
249 Warner, and Wang 2001), suggesting that the cortical tension plays a vital role. However, there is  
250 still controversy in regard to the importance of cortical tension, because it is difficult to estimate the  
251 strength of cortical tension relative to the contractile ring.

252 To address this issue, we perturbed the cortical tension by using the OptoMYPT system.  
253 Blue light was locally and repeatedly illuminated at both poles from the onset of chromosome  
254 segregation (Fig. 4a). SspB-mScarlet-I and SspB-mScarlet-I-MYPT169 were trapped in the polar  
255 region (Control-pole and OptoMYPT-pole, respectively) (Fig. 4b; Movies S6, S7). Because the  
256 overexpression of OptoMYPT might reduce basal actomyosin activity (Fig. S1c), cells expressing  
257 SspB-mScarlet-I-MYPT169 under a dark condition throughout cytokinesis (OptoMYPT-dark) were  
258 also used as a control (Fig. 4b; Movie S8).

259 To evaluate the reduction of cortical tension by local activation of the OptoMYPT, we  
260 focused on the dynamics of membrane blebbing during cytokinesis (Fig. 4c). Because it has been  
261 reported that high cortical tension causes membrane blebbing (Tinevez et al. 2009), we presumed  
262 that the appearance of membrane blebbing and the number of blebs could be used as an indicator of  
263 cortical tension. We counted the number of membrane blebs since the onset of cleavage furrow  
264 ingression, and found a decrease in the number of blebs in OptoMYPT-pole cells as compared to  
265 Control-pole and OptoMYPT-dark cells (Fig. 4c, d). This result is consistent with previous  
266 observations, in which NMIIA-knockout or knockdown alleviated cortical tension during  
267 cytokinesis (Yamamoto et al. 2019; Taneja et al. 2020). Furthermore, smaller membrane blebbing  
268 emerged in Control-pole and OptoMYPT-dark cells from the early phase of cleavage furrow  
269 ingression, and the number of blebs gradually increased as furrow ingressed, whereas OptoMYPT-

270 pole cells exhibited larger membrane blebbing from the late phase of cleavage furrow ingression  
271 (Figs. 4e and S3). Based on these results, we concluded that the cortical tension in both poles  
272 decreased through local application of the OptoMYPT system.

273 Finally, to estimate the strength of cortical tension relative to that of contractile ring tension,  
274 we adapted a coarse-grained physical model describing the mechanics of cytokinesis (Sedzinski et  
275 al. 2011; Yoneda and Dan 1972; Turlier et al. 2014). In this model, the furrow ingression rate ( $v$ ) is  
276 considered to be proportional to the difference between the contractile force of the ring ( $F_r$ ) and the  
277 resisting force exerted by the cortices ( $F_c$ ),  $v \propto F_r - F_c$  (see the Materials and Methods, Fig. S4, and  
278 the Supplementary Discussion). Thus, we measured the furrow ingression rate under each  
279 condition. The ingression rate of the cleavage furrow was significantly higher in OptoMYPT-pole  
280 cells ( $2.26 \pm 0.25 \mu\text{m}/\text{min}$ ) than in Control-pole cells ( $1.55 \pm 0.20 \mu\text{m}/\text{min}$ ) and OptoMYPT-dark  
281 cells ( $1.93 \pm 0.33 \mu\text{m}/\text{min}$ ) (Fig. 4f, g), indicating that the reduced cortical tension accelerates the  
282 cleavage furrow ingression rate. These results highlight the negative contribution of the cortical  
283 tension to the cleavage furrow ingression. Based on the coarse-grained physical model and  
284 experimental data, we estimated that the cortical tension corresponds to at least 14.6% of the ring  
285 tension during cytokinesis (see the Supplementary Discussion).

286

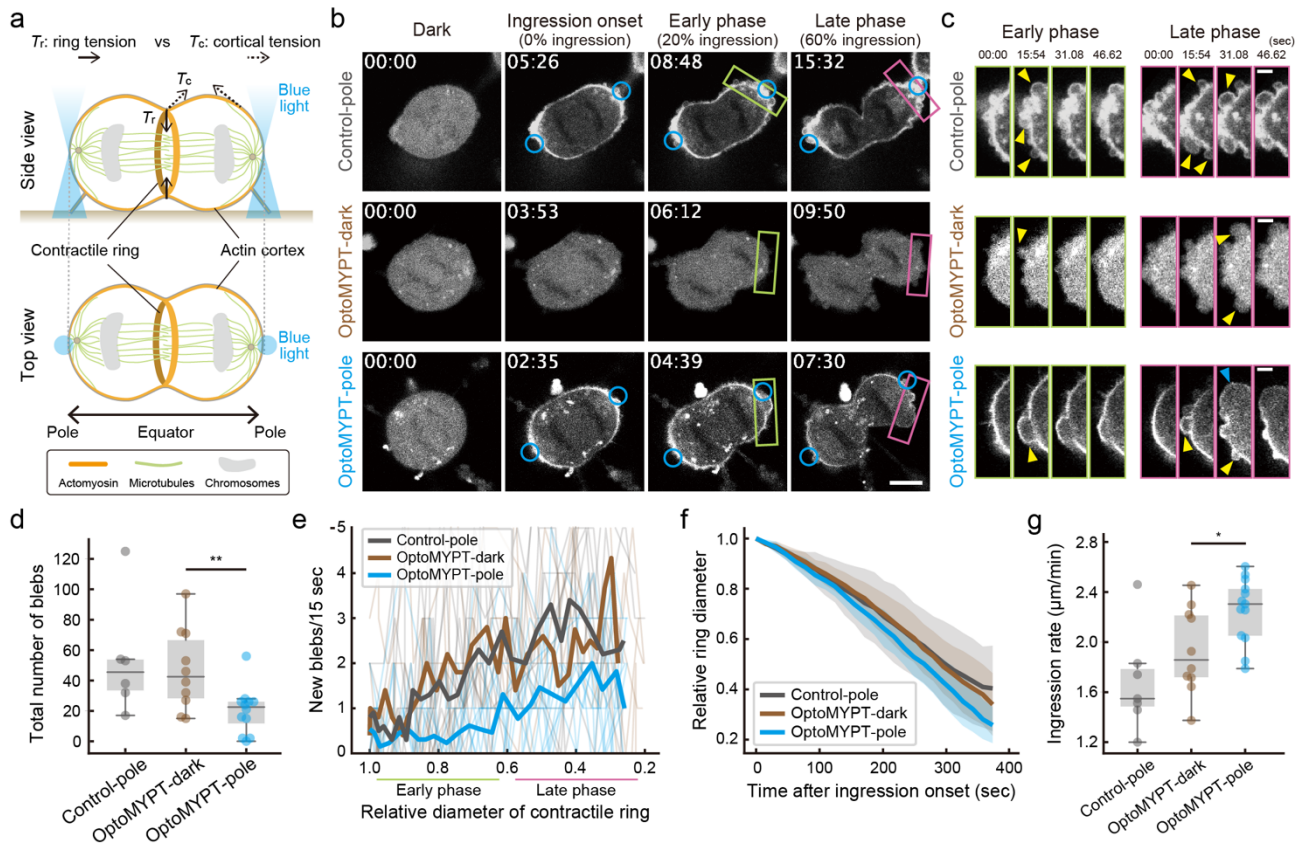

287

288

289

290

291

292

293

294

295

296

297

298

299

300

301

302

303

304

305

306

**Figure 4. Examination of the actomyosin-based cortical tension during cytokinesis with**

**OptoMYPT.** (a) Schematic illustration of cytokinesis in animal cells. Solid and dashed arrows indicate ring tension and cortical tension, respectively. Orange, green, and gray objects indicate actomyosin, microtubules, and chromosomes, respectively. Blue light is focused on the poles on both sides.

(b) Representative images of SspB-mScarlet-I (upper) or SspB-mScarlet-I-MYPT169 (middle and lower) in MDCK cells during cytokinesis. Blue circles in the upper and lower panels indicate blue-light illuminated areas. Middle panels represent cytokinesis of a cell under dark condition. Scale bar, 10  $\mu\text{m}$ . (c) Inset images of polar blebbing (the green and magenta boxed regions in panel b, representing the early and late phases, respectively). Yellow and blue arrowheads indicate small and large new blebs per stack, respectively. Scale bar, 3  $\mu\text{m}$ . (d, e)

Quantification of the total number of blebs during cytokinesis, shown as a box plot (d), and of the number of new blebs emerged within 15.54 sec, shown as a line graph (e), in which thin and bold lines indicate individual and averaged data, respectively.  $n = 5, 10, \text{ and } 13$  cells for Control-pole, OptoMYPT-dark, and OptoMYPT-pole, respectively.  $**p < 0.01$  (student's  $t$ -test). (f, g)

Quantification of the furrow ingression rate after ingression onset. Averaged relative diameters are plotted as a function of time with the SD (f). The ingression rate was estimated by calculating the slope of the ingression rate from 1.0 to 0.6 in panel f, and shown as a box plot (g).  $n = 7, 10, \text{ and } 13$  cells for Control-pole, OptoMYPT-dark, and OptoMYPT-pole, respectively.  $*p < 0.05$  (student's  $t$ -test).

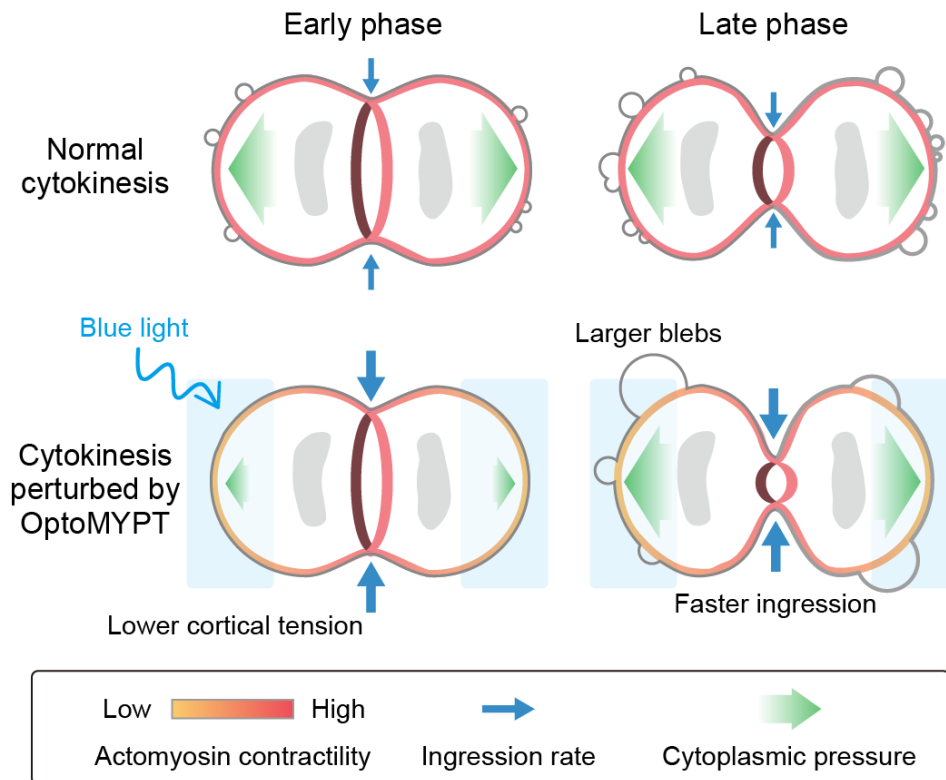

### Figure 5. Schematic model of mechanical regulation of the contractile ring and the actin

**cortex during cytokinesis.** In control cells, high cortical tension acts as a decelerator of the ring constriction. The high cortical tension and cytoplasmic pressure induce blebbing from the early phase of cytokinesis. The increased cytoplasmic pressure associated with ring constriction in the late phase is released by the increased number of blebs. In pole-illuminated OptoMYPT cells, the cleavage furrow ingression is accelerated due to the decrease in the cortical tension. As cleavage furrow ingression progresses, large blebs emerge due to the increased cytoplasmic pressure.

## DISCUSSION

In this study, we developed a new optogenetic tool, OptoMYPT, and demonstrated light-dependent relaxation of cellular forces at the subcellular level. The OptoMYPT is substantially different from existing optogenetic tools related to the cell mechanics in two ways. First, the OptoMYPT reduces contractile forces below the basal level, and therefore provides additional flexibility for *in situ* control of actomyosin contractility and cellular morphology. Second, the OptoMYPT directly regulates NMII through MLC dephosphorylation, whereas optogenetic modulation of RhoA activity or PI(4,5)P<sub>2</sub> may affect pathways other than NMII, since RhoA and PI(4,5)P<sub>2</sub> are known to control various downstream effectors such as ROCK, mDia, and the ezrin-radixin-moesin (ERM) proteins (Oshiro, Fukata, and Kaibuchi 1998; Yonemura et al. 2002; Narumiya, Tanji, and Ishizaki 2009).

328 Using the OptoMYPT system, we experimentally revealed the negative contribution of the  
329 cortical tension to the cleavage furrow ingression rate during cytokinesis; *i.e.*, the decrease in  
330 cortical tension at both poles by OptoMYPT accelerates furrow ingression (Figs. 4 and 5). It has  
331 been reported that the reduction of cortical tension by laser ablation in the polar region decelerates  
332 cleavage furrow ingression in cytokinesis of *C. elegans* embryos (Khaliullin et al. 2018). This  
333 discrepancy could be due to the difference in the force balance between the pole and equator; in *C.*  
334 *elegans* embryos, NMII is actively removed from the polar region and accumulates at the equator  
335 due to the cortical flow, and thus cortical tension is much weaker than ring tension (Chapa-Y-Lazo  
336 et al. 2020; Reymann et al. 2016). Meanwhile, our results indicate that cortical tension in cultured  
337 mammalian cells is comparable to contractile ring tension (Fig. 4), which is in good agreement with  
338 the previous work (Sedzinski et al. 2011). Such a high cortical tension is advantageous because it  
339 confers shape stability to mitotic cells (Sedzinski et al. 2011). This has been corroborated in a  
340 recent paper demonstrating that high cortical stiffness in cancer cells allows them to divide in a  
341 confined environment (Matthews et al. 2020). The benefit of cortical tension is not required in *C.*  
342 *elegans* embryos, because they are covered and protected by a rigid eggshell. However, high  
343 cortical tension is a double-edged sword, because excessive cortical tension induces cytokinetic  
344 shape oscillation and abscission failure (Mukhina, Wang, and Murata-Hori 2007; Taneja et al.  
345 2020; Girard et al. 2004). The estimated cortical tension relative to ring tension ( $F_c/F_r$ ),  $\sim 14.6\%$ ,  
346 may achieve a balance between morphological maintenance and timely cytokinesis.

347 We also focused on the dynamics of membrane blebbing during cytokinesis (Fig. 4).  
348 Although the functional significance of blebbing is poorly understood, except in relation to cell  
349 migration, the mechanisms underlying membrane blebbing have been increasingly reported.  
350 Membrane blebbing is initiated by local rupture of the actin cortex and/or detachment of the actin  
351 cortex from the plasma membrane (Charras and Paluch 2008). The growth of membrane blebs  
352 requires a condition under which hydraulic pressure caused by actomyosin-based cortical tension  
353 overcomes plasma membrane tension (Tinevez et al. 2009). We showed that numerous small blebs  
354 emerged in the “early phase” of furrow ingression in control MDCK cells, and these were  
355 suppressed by relaxation of cortical tension with OptoMYPT (Figs. 4e, 5, and S3). This  
356 phenomenon is clearly consistent with the aforementioned mechanisms. Meanwhile, MDCK cells  
357 expressing OptoMYPT exhibited large blebs in the “late phase” of cleavage furrow ingression when  
358 both poles were illuminated with blue light (Figs. 4 and 5). The late onset of blebbing in the pole-  
359 illuminated cells probably occurs because the progression of cleavage furrow ingression raises  
360 hydraulic pressure, and thereby induces detachment of the actin cortex from the plasma membrane,  
361 leading to the pressure release through bleb formation. To the best of our knowledge, the mechanics  
362 of bleb formation in the “late phase” of the furrow ingression are a hitherto unrecognized process.

363           There still remain some issues to be addressed with respect to the OptoMYPT. First is the  
364 issue of substrate specificity in OptoMYPT. We could not exclude the possibility that the  
365 OptoMYPT dephosphorylates additional substrates other than MLC. However, based on the fact  
366 that the OptoMYPT activation at both poles during cytokinesis did not induce bleb formation, it is  
367 unlikely that OptoMYPT dephosphorylates and inactivates the ERM proteins cross-linking the  
368 plasma membrane and actin cortex to prevent membrane bleb formation (Rodrigues et al. 2015).  
369 The next issue is the localizer of optogenetic switches. In the current OptoMYPT system,  
370 dephosphorylation of MLC was induced by recruiting MYPT169 to the plasma membrane upon  
371 illumination with blue light. However, it is plausible that the OptoMYPT dephosphorylates and  
372 inactivates only the NMII existing in the vicinity of the plasma membrane, and not the NMII in the  
373 other subcellular locations. The use of a localizer that is closer to endogenous active NMII or a  
374 specific localization such as the apical membrane of epithelial cells could result in an OptoMYPT  
375 system with better specificity and spatial resolution than the current version.

376           The OptoMYPT system will provide opportunities not only to understand the mechanics of  
377 morphogenesis, but also to shape the morphology of cells and tissues with precision and flexibility  
378 as desired. Recent papers have applied optogenetic systems *in vivo*, and succeeded in inducing  
379 arbitrary forms of the apical constriction (Izquierdo, Quinkler, and De Renzis 2018). By combining  
380 red light-responsive optogenetic tools such as PhyB-PIF with blue light-responsive tools (Levskaya  
381 et al. 2009; Uda et al. 2017), it will be possible to create more sophisticated morphology with an  
382 increase or decrease in contractile force in the same cells and tissues.

383

384

## 385 **Materials and Methods**

### 386 **Plasmids**

387 The cDNAs of human MYPT1 and PP1c were derived from HeLa cells (Human Science Research  
388 Resources Bank). SspB-mScarlet-I-PP1BDs were obtained by Gibson assembly cloning, combining  
389 the SspB obtained from pPBbsr tgRFpt-SspB and cDNAs of PP1BDs. Stargazin-mEGFP-iLID was  
390 obtained by Gibson assembly cloning, combining the Stargazin derived from Stargazin-GFP-  
391 LOVpep (plasmid #80406: Addgene) and pPBbsr Venus-iLID-CAAX. CRY2 and CIBN-EGFP-  
392 KRasCT were obtained from pCX4puro-CRY2-CRaf and pCX4neo-CIBN-EGFP-KRasCT (Aoki et  
393 al. 2013) and inserted into the pCAGGS vector (Niwa, Yamamura, and Miyazaki 1991). The  
394 cDNAs of Lifeact and NES were obtained by oligo DNA annealing and ligation, and inserted into  
395 each vector. The cDNA of hypBase, an improved PiggyBac transposase (Yusa et al. 2011), was  
396 synthesized (FASMAC), and inserted into the pCAGGS vector. The nucleotide sequences of newly  
397 generated constructs are provided in Table S1.

398

## 399 **Cell culture**

400 MDCK cells (no. RCB0995: RIKEN Bioresource Center) were maintained in minimal essential  
401 medium (MEM; 10370-021: ThermoFisher Scientific) supplemented with 10% fetal bovine serum  
402 (FBS; 172012-500ML: Sigma), 1x Glutamax (35050-061: ThermoFisher), and 1 mM sodium  
403 pyruvate (11360070: ThermoFisher) in a 5% CO<sub>2</sub> humidified incubator at 37°C. The cells were  
404 split as previously reported (Aoki et al. 2017).

405

## 406 **Transfection**

407 Because PP1BDs of MYPT1 fused with fluorescent proteins tend to aggregate for long-term  
408 expression, most experiments were performed by transient expression. The MDCK cells were  
409 electroporated by using Nucleofector IIb (Lonza) according to the manufacturers' instructions (T-  
410 023 program) with a house-made DNA- and cell-suspension solution (4 mM KCl, 10 mM MgCl<sub>2</sub>,  
411 107 mM Na<sub>2</sub>HPO<sub>4</sub>, 13 mM NaH<sub>2</sub>PO<sub>4</sub>, 11 mM HEPES pH. 7.75). After electroporation, the cells  
412 were plated on collagen-coated 35-mm glass-base dishes.

413

## 414 **Establishment of stable cell lines**

415 For transposon-mediated gene transfer, MDCK cells were transfected with PiggyBac donor vectors  
416 and PiggyBac transposase-expressing vectors at a ratio of 3:1. One day after transfections, cells  
417 were treated with 10 µg/mL blasticidin S (InvivoGen, San Diego, CA) or 1.0 µg/mL puromycin  
418 (InvivoGen) for selection. The bright bulk cell population was collected using a cell sorter (MA900;  
419 SONY).

420

## 421 **Live-cell fluorescence imaging**

422 Cells were imaged with an IX83 inverted microscope (Olympus, Tokyo) equipped with an sCMOS  
423 camera (Prime: Photometrics, Tucson, AZ; or ORCA-Fusion BT: Hamamatsu Photonics,  
424 Hamamatsu, Japan), a spinning disk confocal unit (CSU-W1; Yokogawa Electric Corporation,  
425 Tokyo), and diode lasers at wavelengths of 488 nm, 561 nm, and 640 nm. An oil immersion  
426 objective lens (UPLXAPO60XO, N.A. 1.42; Olympus) or an air/dry objective lens  
427 (UPLXAPO40X, N.A. 0.95; Olympus) was used. The excitation laser and fluorescence filter  
428 settings were as follows: Excitation laser, 488 nm (mEGFP), 561 nm (mScarlet-I), and 640 nm  
429 (miRFP703); dichroic mirror, DM 405/488/561 dichroic mirror (mEGFP, mScarlet-I, and  
430 miRFP703); emission filters, 500–550 nm (mEGFP), 580–654 nm (mScarlet-I), and 665–705 nm  
431 (miRFP703). During observation, cells were incubated with a stage incubator set to 37 °C and  
432 containing 5% CO<sub>2</sub> (STXG-IX3WX; Tokai Hit).



433 For global illumination of the blue light, blue LEDs (450 nm) were manually illuminated  
434 from the top of the stage or pulsed blue light (488 nm) was illuminated through the objective lens.  
435 For local light illumination in the interphase cells, a digital micromirror device (Polygon 400;  
436 Mightex) mounted on the IX83 microscopic system, and pT-100 (CoolLED) were used. For local  
437 light illumination during cytokinesis, an SP8 FALCON inverted confocal laser scanning  
438 microscope (Leica) equipped with a water immersion objective lens (HC PL APO 63x/1.20 W  
439 motCORR; Leica) was used. Local light illumination was started using the FRAP function just after  
440 chromosome segregation onset. We illuminated every 3.11 sec, and acquired images every 15.54  
441 sec. The positions of regions of interest (ROIs) were manually corrected every 2 min in all samples.

442 For all time-lapse imaging, MDCK cells were plated on 35 mm glass-base dishes (IWAKI).  
443 Before time-lapse imaging, the medium was replaced with FluoroBrite (Invitrogen) supplemented  
444 with 10% FBS, 1x Glutamax.

445

#### 446 **Immunofluorescence**

447 Cells were fixed with 3.7% formaldehyde in PBS for 20 min, followed by permeabilization by 5  
448 min incubation in 0.05% Triton X-100-containing PBS. Samples were soaked for 30 min in Can  
449 Get Signal immunostain (solution A) (Toyobo, Japan), and then incubated with ppMLC antibody  
450 (1:50 dilution; Cell Signaling Technology #3674) in Can Get Signal immunostain (solution A) for 1  
451 h at room temperature. Next, the cells were washed 3 times with PBS, and then incubated for 1 h at  
452 room temperature with Alexa 555-conjugated anti-rabbit IgG (1:100 dilution; ThermoFisher) in Can  
453 Get Signal immunostain (solution A). Finally, the cells were washed 3 times with PBS and  
454 subjected to fluorescence imaging.

455

#### 456 **Traction force microscopy**

457 Polyacrylamide gel substrates were prepared in accordance with previously published protocols  
458 (Tambe et al., 2011; Trepate et al., 2009). In brief, the gel solution was prepared with 4%  
459 acrylamide, 0.1% bisacrylamide, 0.8% ammonium persulfate, 0.08% TEMED (Nacalai Tesque),  
460 and 5% deep red fluorescent carboxylate-modified beads (0.2  $\mu$ m diameter; F8810; Thermo Fisher  
461 Scientific). 13  $\mu$ L of the mixture was added to a 35 mm glass-base dish (IWAKI) and then covered  
462 with a glass coverslip of 15 mm diameter (Matsunami). After gel polymerization at room  
463 temperature, the surface was coated with 0.3 mg/mL type I collagen (Nitta Gelatin, Osaka, Japan)  
464 using 4 mM sulphosuccinimidyl-6-(4-azido-2-nitrophenylamino) hexanoate (Sulfo-SANPAH;  
465 Pierce). Cells were seeded on the gel, and imaged with a spinning disk confocal microscope. To  
466 quantify the traction force, two Fiji plugins, *i.e.*, the iterative PIV and FTTC plugins, were used.

467 Note that Young's modulus of the gel was estimated as ~2 kPa according to a previous report (Tse  
468 and Engler 2010). The traction force in locally illuminated areas was used for the quantification.

469

### 470 **Immunoblotting**

471 Cells were lysed in 1x SDS sample buffer. After sonication, the samples were separated by 5–20%  
472 gradient SDS-polyacrylamide gel electrophoresis (Nagaiki precast gels; Oriental Instruments, Ltd.)  
473 and transferred to polyvinylidene difluoride membranes (Millipore). After blocking with Odyssey  
474 Blocking Buffer-TBS (LICOR Biosciences) for 1 h, the membranes were incubated with primary  
475 antibodies overnight at 4°C, followed by the secondary antibodies for 1 h at room temperature. For  
476 primary antibodies, ppMLC antibody (1:500 dilution; Cell Signaling Technology #3674), phospho-  
477 Ezrin/Radixin/Moesin antibody (1:500 dilution, Cell Signaling Technology #3276), and  $\alpha$ -Tubulin  
478 antibody (DM1A) (1:5000 dilution; sc-32293; Santa Cruz Biotechnology) were diluted in Odyssey  
479 Blocking Buffer-TBS. For secondary antibodies, IRDye680LT-conjugated goat polyclonal anti-  
480 rabbit IgG (H + L) (1:5000 dilution; LI-COR Bioscience) and IRDye800CW-conjugated donkey  
481 polyclonal anti-mouse IgG (H + L) (1:5000 dilution; LI-COR Bioscience) were diluted in Odyssey  
482 Blocking Buffer-TBS. Proteins were detected with an Odyssey infrared scanner (LI-COR  
483 Bioscience).

484

### 485 **Imaging analysis**

486 All fluorescence imaging data were analyzed and quantified by Fiji (Image J). For all images, the  
487 background was subtracted and images were registered by StackReg, a Fiji plugin to correct  
488 misregistration, if needed. To quantify the cytoplasmic fluorescence intensity changes in Figure 1,  
489 the ROI was selected in each image and normalized by the mean fluorescence intensity of the first  
490 10 images under the dark condition. To quantify the area of membrane protrusion in Figure 3, the  
491 ROI was chosen so as to coincide with the local light-irradiated area. In OptoMYPT-dark cells, the  
492 ROI was a region of lamellipodia similar to that of light-illuminated cells. Fluorescence images of  
493 Lifeact-miRFP703 were binarized and the difference between the area at each time point and at  $t =$   
494 0 was calculated.

495

### 496 **Physical modeling**

497 According to previous modeling efforts on the force balance in a dividing cell (Sedzinski et al.  
498 2011; Yoneda and Dan 1972), the temporal change in radius of the contractile ring,  $R_r$ , is described  
499 as

$$500 \quad \alpha \frac{dR_r}{dt} = - (T_r - 2R_r T_c \cos\theta) \quad - (1),$$

501 where  $\alpha$  is ring viscosity,  $T_r$  is the tension of the contractile ring,  $T_c$  is the tension in the actomyosin  
502 cortex, and  $\theta$  is the angle between the equatorial plane and polar surface at the furrow (see Fig. S4  
503 for the details). Note that our model was simplified from Eq. S1 in the report of (Sedzinski et al.  
504 2011), since we consider symmetric pole shapes. For brevity, let  $F_r$  and  $F_c$  denote  $T_r$  (ring tension)  
505 and  $2R_r T_c \cos \theta$  (cortical tension), respectively (Fig. S4). Then, the furrow ingression rate,  $v$ , can be  
506 expressed as

507 
$$v \propto F_r - F_c. \quad - (2)$$

508

509

## 510 **Acknowledgments**

511 We thank all members of the Aoki Laboratory for their helpful discussions and assistance. We also  
512 thank Michiyuki Matsuda, Naoya Hino (Kyoto University), and Hisayo Fukuda (Kansai Medical  
513 University) for the advice on electroporation. K.Y. was supported by a JSPS KAKENHI Grant  
514 (19J20538). Y.K. was supported by JSPS KAKENHI Grants (19K16207, 19H05675). K.A. was  
515 supported by a CREST, JST Grant (JPMJCR1654), and JSPS KAKENHI Grants (18H0244,  
516 19H05798). This research was supported by Joint Research of the Exploratory Research Center on  
517 Life and Living Systems (ExCELLS) (ExCELLS program No.18-204, 19-205, 20-204).

518

519

## 520 **Author contributions**

521 K.Y. and K.A. designed the research. K.Y., H.M., M.I. and S.S. performed experiments. K.Y. and  
522 H.M. analyzed data. K.Y., Y.K., and K.A. wrote the manuscript.

523

524

## 525 **Declaration of Interests**

526 The authors declare no competing interests.

## 527 **References**

- 528 Aoki, Kazuhiro, Yohei Kondo, Honda Naoki, Toru Hiratsuka, Reina E. Itoh, and Michiyuki  
529 Matsuda. 2017. “Propagating Wave of ERK Activation Orients Collective Cell Migration.”  
530 *Developmental Cell* 43 (3): 305–17.e5.
- 531 Aoki, Kazuhiro, Yuka Kumagai, Atsuro Sakurai, Naoki Komatsu, Yoshihisa Fujita, Clara Shionyu,  
532 and Michiyuki Matsuda. 2013. “Stochastic ERK Activation Induced by Noise and Cell-to-Cell  
533 Propagation Regulates Cell Density-Dependent Proliferation.” *Molecular Cell* 52 (4): 529–40.
- 534 Chapa-Y-Lazo, Bernardo, Motonari Hamanaka, Alexander Wray, Mohan K. Balasubramanian, and  
535 Masanori Mishima. 2020. “Polar Relaxation by Dynein-Mediated Removal of Cortical Myosin II.”  
536 *The Journal of Cell Biology* 219 (8). <https://doi.org/10.1083/jcb.201903080>.
- 537 Charras, Guillaume, and Ewa Paluch. 2008. “Blebs Lead the Way: How to Migrate without  
538 Lamellipodia.” *Nature Reviews. Molecular Cell Biology* 9 (9): 730–36.
- 539 Du, Guangwei, and Michael A. Frohman. 2009. “A Lipid-Signaled Myosin Phosphatase Surge  
540 Disperses Cortical Contractile Force Early in Cell Spreading.” *Molecular Biology of the Cell* 20 (1):  
541 200–208.
- 542 Even-Ram, Sharona, Andrew D. Doyle, Mary Anne Conti, Kazue Matsumoto, Robert S. Adelstein,  
543 and Kenneth M. Yamada. 2007. “Myosin IIA Regulates Cell Motility and Actomyosin-Microtubule  
544 Crosstalk.” *Nature Cell Biology* 9 (3): 299–309.
- 545 Girard, Kristine D., Charles Chaney, Michael Delannoy, Scot C. Kuo, and Douglas N. Robinson.  
546 2004. “Dynacortin Contributes to Cortical Viscoelasticity and Helps Define the Shape Changes of  
547 Cytokinesis.” *The EMBO Journal* 23 (7): 1536–46.
- 548 Green, Rebecca A., Ewa Paluch, and Karen Oegema. 2012. “Cytokinesis in Animal Cells.” *Annual  
549 Review of Cell and Developmental Biology* 28 (1): 29–58.
- 550 Guglielmi, Giorgia, Joseph D. Barry, Wolfgang Huber, and Stefano De Renzis. 2015. “An  
551 Optogenetic Method to Modulate Cell Contractility during Tissue Morphogenesis.” *Developmental  
552 Cell* 35 (5): 646–60.
- 553 Guntas, Gurkan, Ryan A. Hallett, Seth P. Zimmerman, Tishan Williams, Hayretin Yumerefendi,  
554 James E. Bear, and Brian Kuhlman. 2015. “Engineering an Improved Light-Induced Dimer (iLID)  
555 for Controlling the Localization and Activity of Signaling Proteins.” *Proceedings of the National  
556 Academy of Sciences of the United States of America* 112 (1): 112–17.
- 557 Heissler, Sarah M., and Dietmar J. Manstein. 2013. “Nonmuscle Myosin-2: Mix and Match.”  
558 *Cellular and Molecular Life Sciences: CMLS* 70 (1): 1–21.
- 559 Hirano, K., B. C. Phan, and D. J. Hartshorne. 1997. “Interactions of the Subunits of Smooth Muscle  
560 Myosin Phosphatase.” *The Journal of Biological Chemistry* 272 (6): 3683–88.

- 561 Houk, Andrew R., Alexandra Jilkin, Cecile O. Mejean, Rostislav Boltyanskiy, Eric R. Dufresne,  
562 Sigurd B. Angenent, Steven J. Altschuler, Lani F. Wu, and Orion D. Weiner. 2012. “Membrane  
563 Tension Maintains Cell Polarity by Confining Signals to the Leading Edge during Neutrophil  
564 Migration.” *Cell* 148 (1-2): 175–88.
- 565 Ito, Masaaki, Takeshi Nakano, Ferenc Erd, and David J. Hartshorne. 2004. “Myosin Phosphatase:  
566 Structure, Regulation and Function.” *Molecular and Cellular Biochemistry* 259: 197–209.
- 567 Izquierdo, Emiliano, Theresa Quinkler, and Stefano De Renzis. 2018. “Guided Morphogenesis  
568 through Optogenetic Activation of Rho Signalling during Early *Drosophila* Embryogenesis.”  
569 *Nature Communications* 9 (1): 2366.
- 570 Kelkar, Manasi, Pierre Bohec, and Guillaume Charras. 2020. “Mechanics of the Cellular Actin  
571 Cortex: From Signalling to Shape Change.” *Current Opinion in Cell Biology* 66 (June): 69–78.
- 572 Kennedy, Matthew J., Robert M. Hughes, Leslie A. Peteya, Joel W. Schwartz, Michael D. Ehlers,  
573 and Chandra L. Tucker. 2010. “Rapid Blue-Light-Mediated Induction of Protein Interactions in  
574 Living Cells.” *Nature Methods* 7 (12): 973–75.
- 575 Khaliullin, Renat N., Rebecca A. Green, Linda Z. Shi, J. Sebastian Gomez-Cavazos, Michael W.  
576 Berns, Arshad Desai, and Karen Oegema. 2018. “A Positive-Feedback-Based Mechanism for  
577 Constriction Rate Acceleration during Cytokinesis in *Caenorhabditis Elegans*.” *eLife* 7 (July).  
578 <https://doi.org/10.7554/eLife.36073>.
- 579 Kimura, K., M. Ito, M. Amano, K. Chihara, Y. Fukata, M. Nakafuku, B. Yamamori, et al. 1996.  
580 “Regulation of Myosin Phosphatase by Rho and Rho-Associated Kinase (Rho-Kinase).” *Science*  
581 273 (5272): 245–48.
- 582 Krueger, Daniel, Emiliano Izquierdo, Ranjith Viswanathan, Jonas Hartmann, Cristina Pallares  
583 Cartes, and Stefano De Renzis. 2019. “Principles and Applications of Optogenetics in  
584 Developmental Biology.” *Development* 146 (20). <https://doi.org/10.1242/dev.175067>.
- 585 Levskaya, Anselm, Orion D. Weiner, Wendell A. Lim, and Christopher A. Voigt. 2009.  
586 “Spatiotemporal Control of Cell Signalling Using a Light-Switchable Protein Interaction.” *Nature*  
587 461 (7266): 997–1001.
- 588 Martin, Katrin, Andreas Reimann, Rafael D. Fritz, Hyunryul Ryu, Noo Li Jeon, and Olivier Pertz.  
589 2016. “Spatio-Temporal Co-Ordination of RhoA, Rac1 and Cdc42 Activation during Prototypical  
590 Edge Protrusion and Retraction Dynamics.” *Scientific Reports* 6 (February): 21901.
- 591 Matthews, Helen K., Sushila Ganguli, Katarzyna Plak, Anna V. Taubenberger, Zaw Win, Max  
592 Williamson, Matthieu Piel, Jochen Guck, and Buzz Baum. 2020. “Oncogenic Signaling Alters Cell  
593 Shape and Mechanics to Facilitate Cell Division under Confinement.” *Developmental Cell* 52 (5):  
594 563–73.e3.
- 595 Mukhina, Svetlana, Yu-Li Wang, and Maki Murata-Hori. 2007. “Alpha-Actinin Is Required for

- 596 Tightly Regulated Remodeling of the Actin Cortical Network during Cytokinesis.” *Developmental*  
597 *Cell* 13 (4): 554–65.
- 598 Narumiya, Shuh, Masahiro Tanji, and Toshimasa Ishizaki. 2009. “Rho Signaling, ROCK and  
599 mDia1, in Transformation, Metastasis and Invasion.” *Cancer Metastasis Reviews* 28 (1-2): 65–76.
- 600 Natwick, Dean E., and Sean R. Collins. 2021. “Optimized iLID Membrane Anchors for Local  
601 Optogenetic Protein Recruitment.” *ACS Synthetic Biology*, April.  
602 <https://doi.org/10.1021/acssynbio.0c00511>.
- 603 Niwa, H., K. Yamamura, and J. Miyazaki. 1991. “Efficient Selection for High-Expression  
604 Transfectants with a Novel Eukaryotic Vector.” *Gene* 108 (2): 193–99.
- 605 Oakes, Patrick W., Elizabeth Wagner, Christoph A. Brand, Dimitri Probst, Marco Linke, Ulrich S.  
606 Schwarz, Michael Glotzer, and Margaret L. Gardel. 2017. “Optogenetic Control of RhoA Reveals  
607 Zyxin-Mediated Elasticity of Stress Fibres.” *Nature Communications* 8 (June): 15817.
- 608 O’Connell, C. B., A. K. Warner, and Y. Wang. 2001. “Distinct Roles of the Equatorial and Polar  
609 Cortices in the Cleavage of Adherent Cells.” *Current Biology: CB* 11 (9): 702–7.
- 610 Oshiro, Noriko, Yuko Fukata, and Kozo Kaibuchi. 1998. “Phosphorylation of Moesin by Rho-  
611 Associated Kinase (Rho-Kinase) Plays a Crucial Role in the Formation of Microvilli-like Structures  
612 \*.” *The Journal of Biological Chemistry* 273 (52): 34663–66.
- 613 Paluch, Ewa K., Irene M. Aspalter, and Michael Sixt. 2016. “Focal Adhesion-Independent Cell  
614 Migration.” *Annual Review of Cell and Developmental Biology* 32 (October): 469–90.
- 615 Reymann, Anne-Cecile, Fabio Staniscia, Anna Erzberger, Guillaume Salbreux, and Stephan W.  
616 Grill. 2016. “Cortical Flow Aligns Actin Filaments to Form a Furrow.” *eLife* 5 (October).  
617 <https://doi.org/10.7554/eLife.17807>.
- 618 Ridley, Anne J., Martin A. Schwartz, Keith Burridge, Richard A. Firtel, Mark H. Ginsberg, Gary  
619 Borisy, J. Thomas Parsons, and Alan Rick Horwitz. 2003. “Cell Migration: Integrating Signals from  
620 Front to Back.” *Science* 302 (5651): 1704–9.
- 621 Rodrigues, Nelio T. L., Sergey Lekomtsev, Silvana Jananji, Janos Kriston-Vizi, Gilles R. X.  
622 Hickson, and Buzz Baum. 2015. “Kinetochore-Localized PP1-Sds22 Couples Chromosome  
623 Segregation to Polar Relaxation.” *Nature* 524 (7566): 489–92.
- 624 Saitoh, M., T. Ishikawa, S. Matsushima, M. Naka, and H. Hidaka. 1987. “Selective Inhibition of  
625 Catalytic Activity of Smooth Muscle Myosin Light Chain Kinase.” *The Journal of Biological*  
626 *Chemistry* 262 (16): 7796–7801.
- 627 Sedzinski, Jakub, Maté Biro, Annelie Oswald, Jean Yves Tinevez, Guillaume Salbreux, and Ewa  
628 Paluch. 2011. “Polar Actomyosin Contractility Destabilizes the Position of the Cytokinetic  
629 Furrow.” *Nature* 476 (7361): 462–68.
- 630 Straight, Aaron F., Amy Cheung, John Limouze, Irene Chen, Nick J. Westwood, James R. Sellers,

- 631 and Timothy J. Mitchison. 2003. “Dissecting Temporal and Spatial Control of Cytokinesis with a  
632 Myosin II Inhibitor.” *Science* 299 (5613): 1743–47.
- 633 Taneja, Nilay, Matthew R. Bersi, Sophie M. Baillargeon, Aidan M. Fenix, James A. Cooper,  
634 Ryoma Ohi, Vivian Gama, W. David Merryman, and Dylan T. Burnette. 2020. “Precise Tuning of  
635 Cortical Contractility Regulates Cell Shape during Cytokinesis.” *Cell Reports* 31 (1): 107477.
- 636 Tinevez, Jean-Yves, Ulrike Schulze, Guillaume Salbreux, Julia Roensch, Jean-François Joanny, and  
637 Ewa Paluch. 2009. “Role of Cortical Tension in Bleb Growth.” *Proceedings of the National  
638 Academy of Sciences of the United States of America* 106 (44): 18581–86.
- 639 Totsukawa, Go, Yue Wu, Yasuharu Sasaki, David J. Hartshorne, Yoshihiko Yamakita, Shigeko  
640 Yamashiro, and Fumio Matsumura. 2004. “Distinct Roles of MLCK and ROCK in the Regulation  
641 of Membrane Protrusions and Focal Adhesion Dynamics during Cell Migration of Fibroblasts.” *The  
642 Journal of Cell Biology* 164 (3): 427–39.
- 643 Tse, Justin R., and Adam J. Engler. 2010. “Preparation of Hydrogel Substrates with Tunable  
644 Mechanical Properties.” *Current Protocols in Cell Biology / Editorial Board, Juan S. Bonifacino ...  
645 [et Al.]* Chapter 10 (June): Unit 10.16.
- 646 Turlier, Hervé, Basile Audoly, Jacques Prost, and Jean-François Joanny. 2014. “Furrow  
647 Constriction in Animal Cell Cytokinesis.” *Biophysical Journal* 106 (1): 114–23.
- 648 Uda, Youichi, Yuhei Goto, Shigekazu Oda, Takayuki Kohchi, Michiyuki Matsuda, and Kazuhiro  
649 Aoki. 2017. “Efficient Synthesis of Phycocyanobilin in Mammalian Cells for Optogenetic Control  
650 of Cell Signaling.” *Proceedings of the National Academy of Sciences* 114 (45): 11962–67.
- 651 Uehata, M., T. Ishizaki, H. Satoh, T. Ono, T. Kawahara, T. Morishita, H. Tamakawa, et al. 1997.  
652 “Calcium Sensitization of Smooth Muscle Mediated by a Rho-Associated Protein Kinase in  
653 Hypertension.” *Nature* 389 (6654): 990–94.
- 654 Valon, Léo, Ariadna Marín-Llauradó, Thomas Wyatt, Guillaume Charras, and Xavier Trepât. 2017.  
655 “Optogenetic Control of Cellular Forces and Mechanotransduction.” *Nature Communications* 8  
656 (February): 14396.
- 657 Vicente-Manzanares, M., X. Ma, R. S. Adelstein, and A. R. Horwitz. 2009. “Non-Muscle Myosin II  
658 Takes Centre Stage in Cell Adhesion and Migration.” *Nature reviews.Molecular Cell Biology* 10  
659 (11): 778–90.
- 660 Wagner, Elizabeth, and Michael Glotzer. 2016. “Local RhoA Activation Induces Cytokinetic  
661 Furrows Independent of Spindle Position and Cell Cycle Stage.” *The Journal of Cell Biology* 213  
662 (6): 641–49.
- 663 Worthylake, Rebecca A., and Keith Burridge. 2003. “RhoA and ROCK Promote Migration by  
664 Limiting Membrane Protrusions \*.” *The Journal of Biological Chemistry* 278 (15): 13578–84.
- 665 Wu, Yue, Andrea Murányi, Ferenc Erdodi, and David J. Hartshorne. 2005. “Localization of Myosin

- 666 Phosphatase Target Subunit and Its Mutants.” *Journal of Muscle Research and Cell Motility* 26 (2-  
667 3): 123–34.
- 668 Yamamoto, Kei, Kohei Otomo, Tomomi Nemoto, Seiichiro Ishihara, Hisashi Haga, Akira  
669 Nagasaki, Yota Murakami, and Masayuki Takahashi. 2019. “Differential Contributions of  
670 Nonmuscle Myosin IIA and IIB to Cytokinesis in Human Immortalized Fibroblasts.” *Experimental*  
671 *Cell Research*. <https://doi.org/10.1016/j.yexcr.2019.01.020>.
- 672 Yoneda, M., and K. Dan. 1972. “Tension at the Surface of the Dividing Sea-Urchin Egg.” *The*  
673 *Journal of Experimental Biology* 57 (3): 575–87.
- 674 Yonemura, Shigenobu, Takeshi Matsui, Shoichiro Tsukita, and Sachiko Tsukita. 2002. “Rho-  
675 Dependent and -Independent Activation Mechanisms of Ezrin/radixin/moesin Proteins: An  
676 Essential Role for Polyphosphoinositides in Vivo.” *Journal of Cell Science* 115 (Pt 12): 2569–80.
- 677 Yusa, Kosuke, Liqin Zhou, Meng Amy Li, Allan Bradley, and Nancy L. Craig. 2011. “A  
678 Hyperactive piggyBac Transposase for Mammalian Applications.” *Proceedings of the National*  
679 *Academy of Sciences of the United States of America* 108 (4): 1531–36.
